# Supplementary material for: Catalytic Conversion of High Fructose Corn Syrup to Methyl Lactate with CoO@silicalite-1
Source: MDPI journal article supplement (doi:10.3390/catal12040442), 2022-04-14
Supplement: s1 [file s1]

# Supplementary Material

## Catalytic Conversion of High Fructose Corn Syrup to Methyl Lactate with CoO@silicalite-1

Yuxi Jiang <sup>1</sup>, Xilei Lyu <sup>1,2,\*</sup>, Hao Chen <sup>1</sup>, Xiwen Wei <sup>1</sup>, Zihao Zhang <sup>3</sup>, and Xiuyang Lu <sup>1,\*</sup>

<sup>1</sup> Key Laboratory of Biomass Chemical Engineering of Ministry of Education, College of Chemical and Biological Engineering, Zhejiang University, Hangzhou 310027, China; 11928049@zju.edu.cn (Y.J.); chenhaoch@hnu.edu.cn (H.C.); weixiwen1998@163.com (X.W.)

<sup>2</sup> Institute of Chemical Engineering, Zhejiang Hengyi Petrochemical Research Institute Co., Ltd., Hangzhou 311209, China

<sup>3</sup> Paul Scherrer Institute, Villigen 5232, Switzerland; utzhangzihao@gmail.com

\* Correspondence: 11428044@zju.edu.cn (Xilei Lyu); luxiuyang@zju.edu.cn (Xiuyang Lu)

### Materials and Chemicals

Polyvinylpyrrolidone and Co(NO<sub>3</sub>)<sub>2</sub>·6H<sub>2</sub>O (99%) were purchased from Aladdin Chemicals (Shanghai, China). Silica gel (30 wt% in water) and citric acid monohydrate (99.5%) were bought from Macklin reagent (Shanghai, China). Methyl lactate (98%), tetrapropylammonium hydroxide (25 wt% in water), and methanol (AR) were bought from the Sinopharm Chemical Reagent (China). Methoxyacetaldehyde dimethyl acetal (98%) was purchased from J & K Scientific (Beijing, China). Glycolaldehyde dimethyl acetal (98%) and HFCS-55 were supplied by Alfa Aesar and Qianfengxiang Food Co., Ltd (Wuhan, Hubei), respectively.

### Detailed preparation of catalyst

The synthesis of c-CoO@silicalite-1 via a steam-assisted method followed the procedure of our group [1] with some modifications. Briefly, a certain amount of Co(NO<sub>3</sub>)<sub>2</sub>·6H<sub>2</sub>O and 0.1 g PVP were dissolved in 30 mL water and stirred until the solution become transparent. Then, under stirring 3 g silica gel (30 wt% in water) was added and the mixture was stirred for 10 min. Then 1.5 g tetrapropylammonium hydroxide (TPAOH, 25% in water) was added into the mixture. After they were stirred at room temperature for 15 min the solution was rotary evaporated at 50 °C. After removing all the water, the dry gel was placed in the 50 mL Teflon cup and that was placed into a 100 mL Teflon-lined autoclave. A certain amount of water was added outside the Teflon cup (the mass ratio of water to dry gel is 1:5). Afterwards, the autoclave was heated to 130 °C for 3 days. The obtained solid was washed for three times with ethanol, water, and ethanol, respectively. And then the solid was dried under 60 °C for 12 h followed by calcination at 550 °C for 6 h to remove residual template. Before catalytic reaction the zeolite was only pretreated with citric acid (0.5 M, 70 °C, 100 mL/g zeolite, 2 h), then washed with water and dried for 12 h. Finally, the solid sample was calcined at 550 °C for 6 h to obtain c-CoO@silicalite-1. A series of synthesized catalysts was identified as c-Co<sub>x</sub>, where x is the amount of Co(NO<sub>3</sub>)<sub>2</sub>·6H<sub>2</sub>O (mmol) required in the synthesis of the catalyst. The pictures of the Teflon-lined autoclave and the Teflon cup were shown in Figure S1.

**Figure S1**

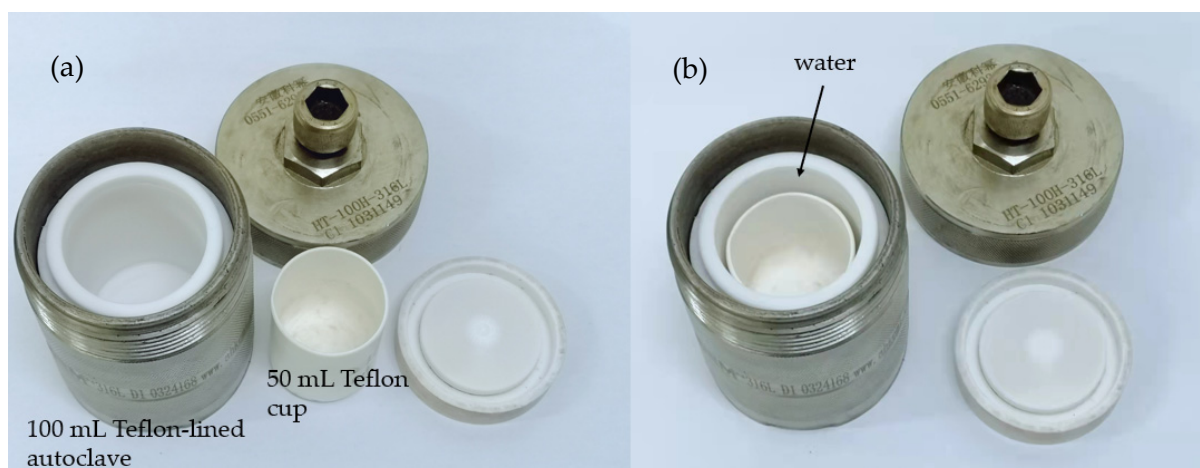

Figure S1. The Teflon-lined autoclave (a) and the Teflon cup (b).

**Figure S2**

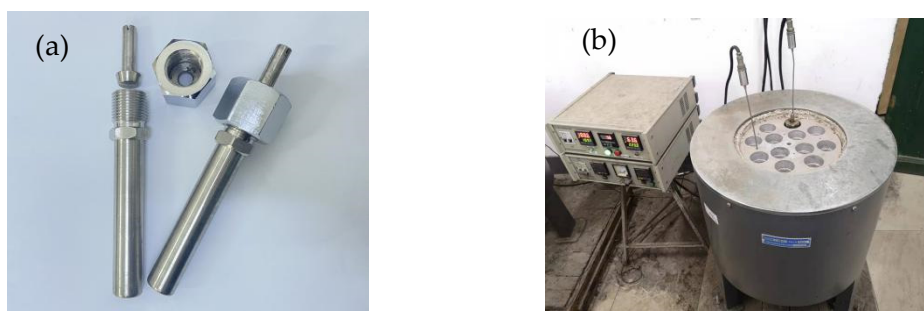

Figure S2. The photos of the stainless steel reactor (a) and heating furnace (b).

**Table S1**

**Table S1.** Composition of HFCS-55 detected by HPLC

|          | Content | Relative content of fructose and glucose |
|----------|---------|------------------------------------------|
| fructose | 41.1%   | 55.9%                                    |
| glucose  | 32.4%   | 44.1%                                    |

**Figure S3**

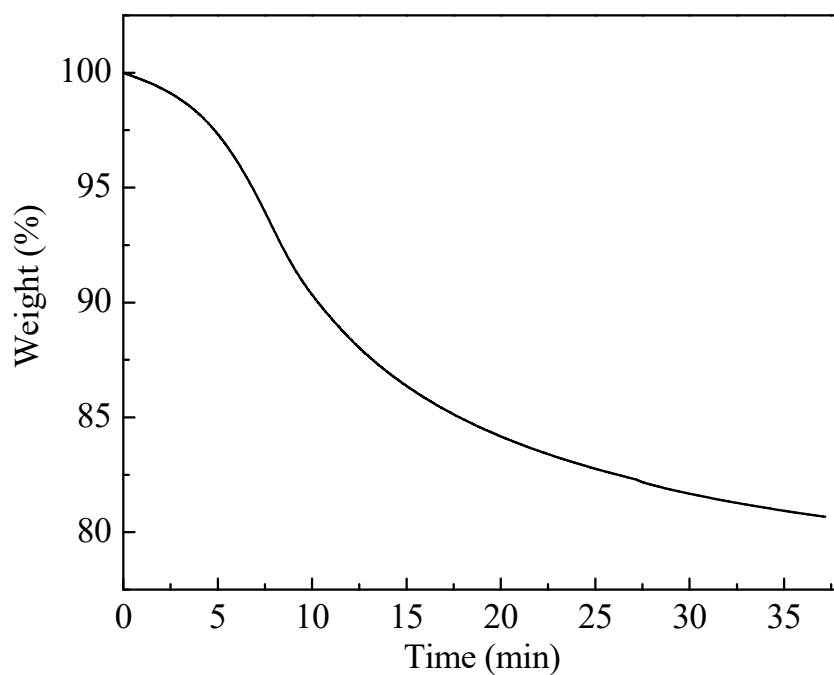

**Figure S3.** TG analysis of HFCS-55.

**Figure S4**

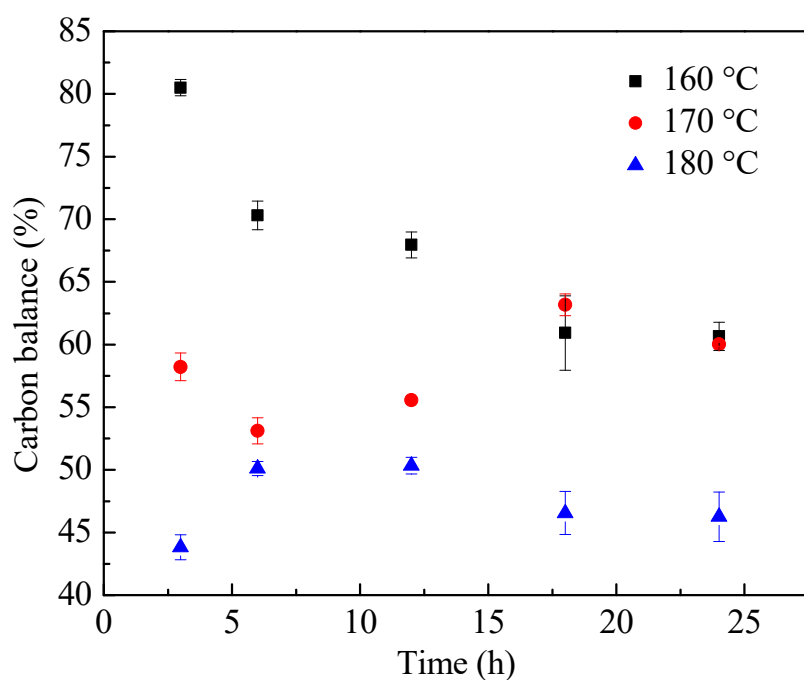

**Figure S4.** The carbon balance of the catalytic conversion of HFCS-55 under different reaction temperatures and time.

## References

1. Yan, Y.; Zhang, Z.; Bak, S.-M.; Yao, S.; Hu, X.; Shadike, Z.; Do-Thanh, C.-L.; Zhang, F.; Chen, H.; Lyu, X.; et al. Confinement of Ultrasmall Cobalt Oxide Clusters within Silicalite-1 Crystals for Efficient Conversion of Fructose into Methyl Lactate. *ACS Catal.* **2018**, *9*, 1923–1930. <https://doi.org/10.1021/acscatal.8b03230>
